# Supplementary material for: Next-Generation Digital Polymerase Chain Reaction: High-Dynamic-Range Single-Molecule DNA Counting via Ultrapartitioning
Source: PubMed Central journal article supplement — Anal Chem. 2022 Dec 12;94(51):17868–76. doi: 10.1021/acs.analchem.2c03649 (PMC9798378; doi:10.1021/acs.analchem.2c03649), 2022-12-12
Supplement: ac2c03649_si_001.pdf [file ac2c03649_si_001.pdf]

SUPPORTING INFORMATION TO:

## “Next generation digital PCR: high dynamic range single molecule DNA counting via ultra-partitioning”

Eleen Y. Shum‡\*, Janice H. Lai‡, Sixing Li, Haeun G. Lee, Jesse Soliman, Vedant K. Raol, Cavina K. Lee, Stephen P.A. Fodor, H. Christina Fan\*

Enumerix, Inc. 4030 Fabian Way, Palo Alto, CA 94070

\*Corresponding Authors

‡These authors contributed equally.

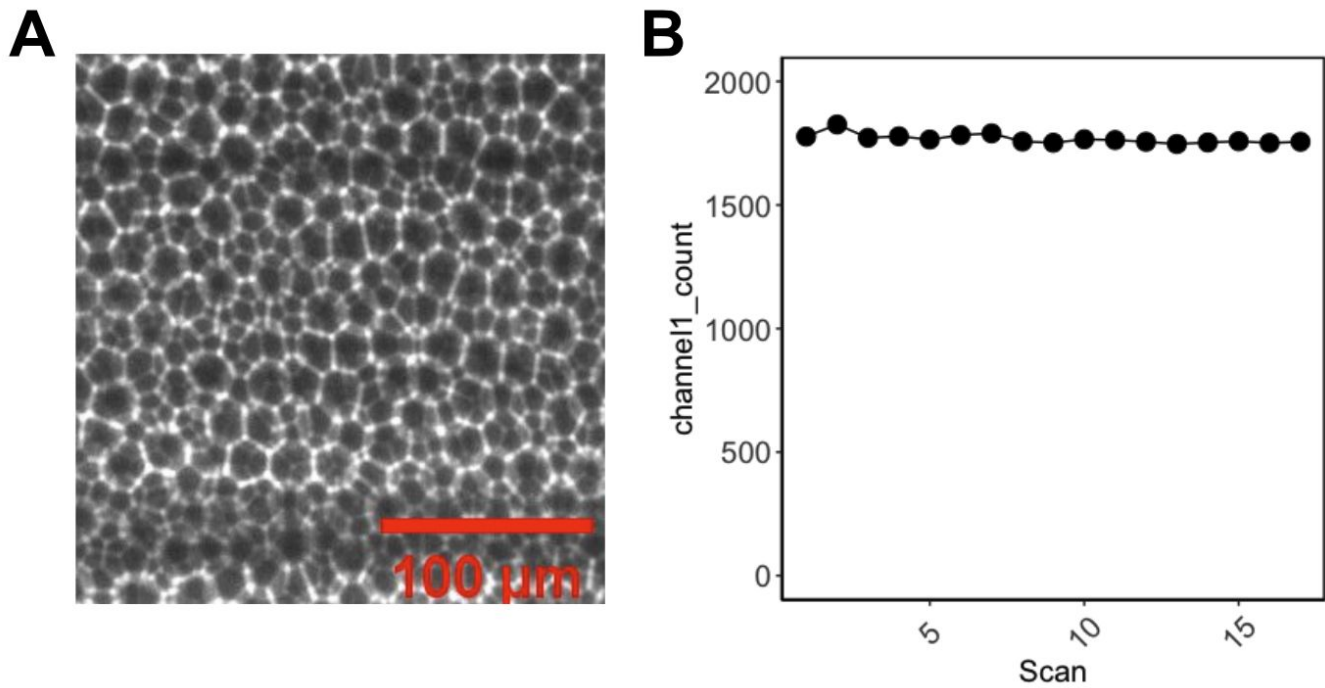

**Figure S1. Ultra-partitions have high packing efficiency and are immobilized.**

- (A) Image from lightsheet microscopy of ultra-partitions where Nile Red oil stain is spiked into the emulsion oil to visualize droplet shells via fluorescence. The centrifugation step during ultra-partitioning enables droplets to be densely packed, showcased by this Nile Red image. The resulting ultra-partitions forms a viscous gel that immobilizes the emulsion, allowing for stable and repeatable 3D imaging of ultra-partitions.
- (B) UltraPCR emulsion stability test. A sample with *prfA* template from *L. monocytogenes* was measured using UltraPCR repeatedly scanned 17 times over the course of 7 months. Using a *prfA*-FAM conjugated TaqMan probe, droplet fluorescence intensity decreases after each scanning event due to photobleaching (data not shown), but can still be counted using the droplet counting algorithm.

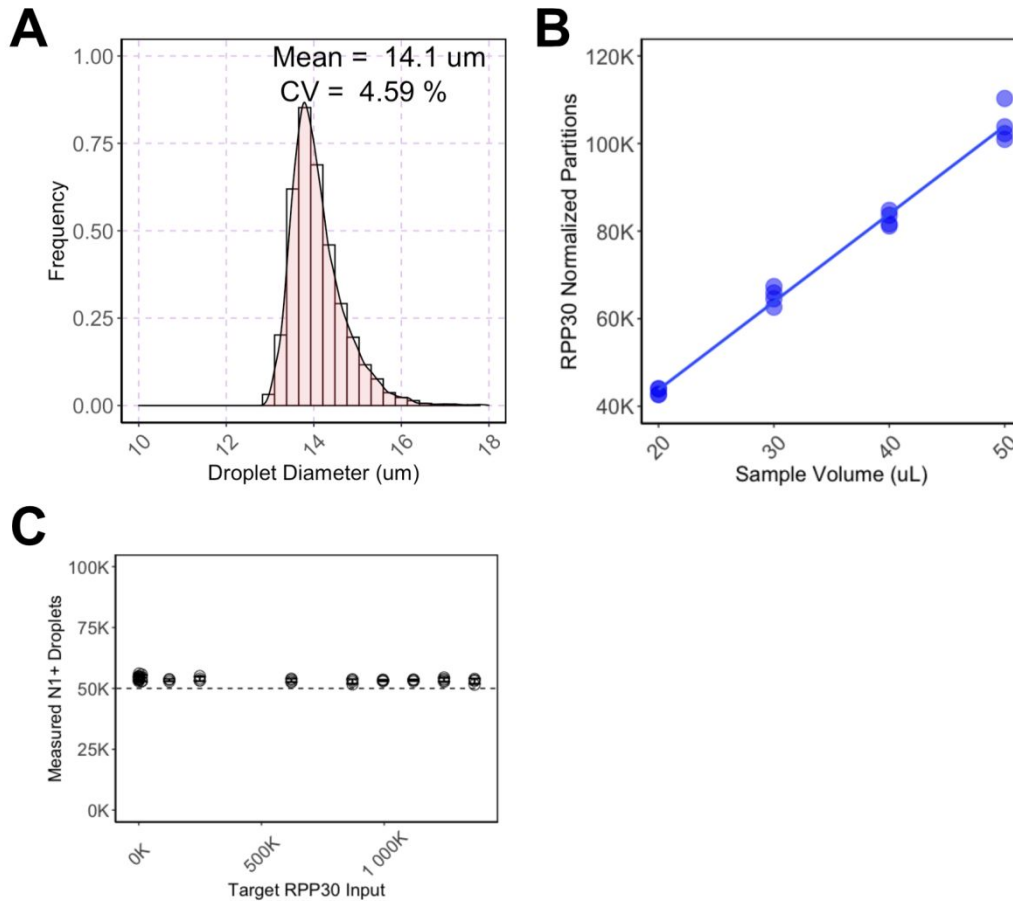

**Figure S2. UltraPCR emulsion and dynamic range characterization.**

- (A) Droplet diameter of ultra-partitions, analyzed via brightfield microscopy and MATLAB. Due to the dense packing of ultra-partitions, more accurate droplet size measurement is achieved through dilution of the emulsion with Emulsion Oil and counted on a hemocytometer chip.
- (B) Volume titration using the same PCR mix to amplify human *RPP30* amplicon. Each volume has 4 technical replicates with a linear regression fitted (Adjusted R2 = 0.9621).
- (C) In the 6-log *RPP30* titration experiment shown Figure 4, each replicate was also multiplexed with *SARS-CoV-2 N1* assay with a target of ~50K copies of target DNA. Even when adding *RPP30* at higher DNA copies through a 6-log range, the accuracy and precision of multiplexing with *N1* remains consistent.

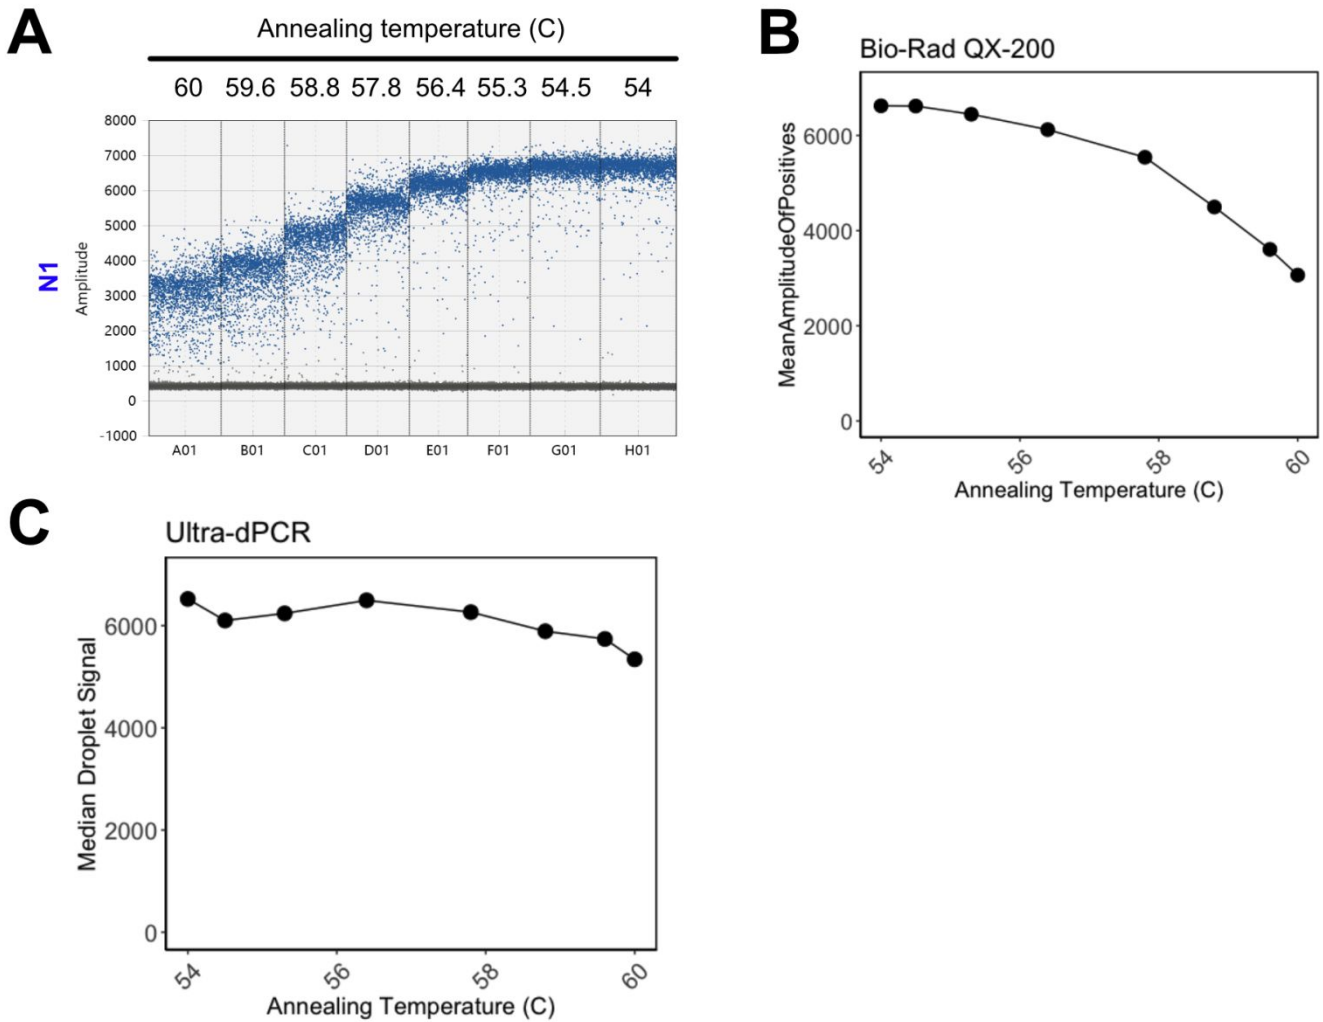

**Figure S3. Assay optimization for orthogonal testing.**

- (A) 1D amplitude plot representing data from annealing temperature gradient optimization on Bio-Rad QX-200 of SARS-CoV-2 *N1* amplicon to establish an amplification protocol for orthogonal comparison. This assay is particularly sensitive in Bio-Rad QX-200 system. To maximize signal-to-noise separation, 54°C was chosen as the optimized annealing temperature on this system.
- (B) Mean amplitude of positive droplets versus annealing temperature as provided by the QuantaSoft software to further showcase that this *N1* assay performance is highly variable on QX-200, as amplitude of signal of positive partitions drops by ~50% from annealing temperature of 54°C to 60°C.
- (C) Median amplitude of *RPP30*-positive droplets measured by UltraPCR. Compared to Bio-Rad QX-200, *N1* assay performance on UltraPCR is less susceptible to annealing temperature change, exemplified by only a mild drop in median positive-partition signal. Due to the nature of UltraPCR having low DNA occupancy relative to the ~30 million partition capacity, standard 1D amplitude plots are not representative methods to visualize positive droplet metrics.

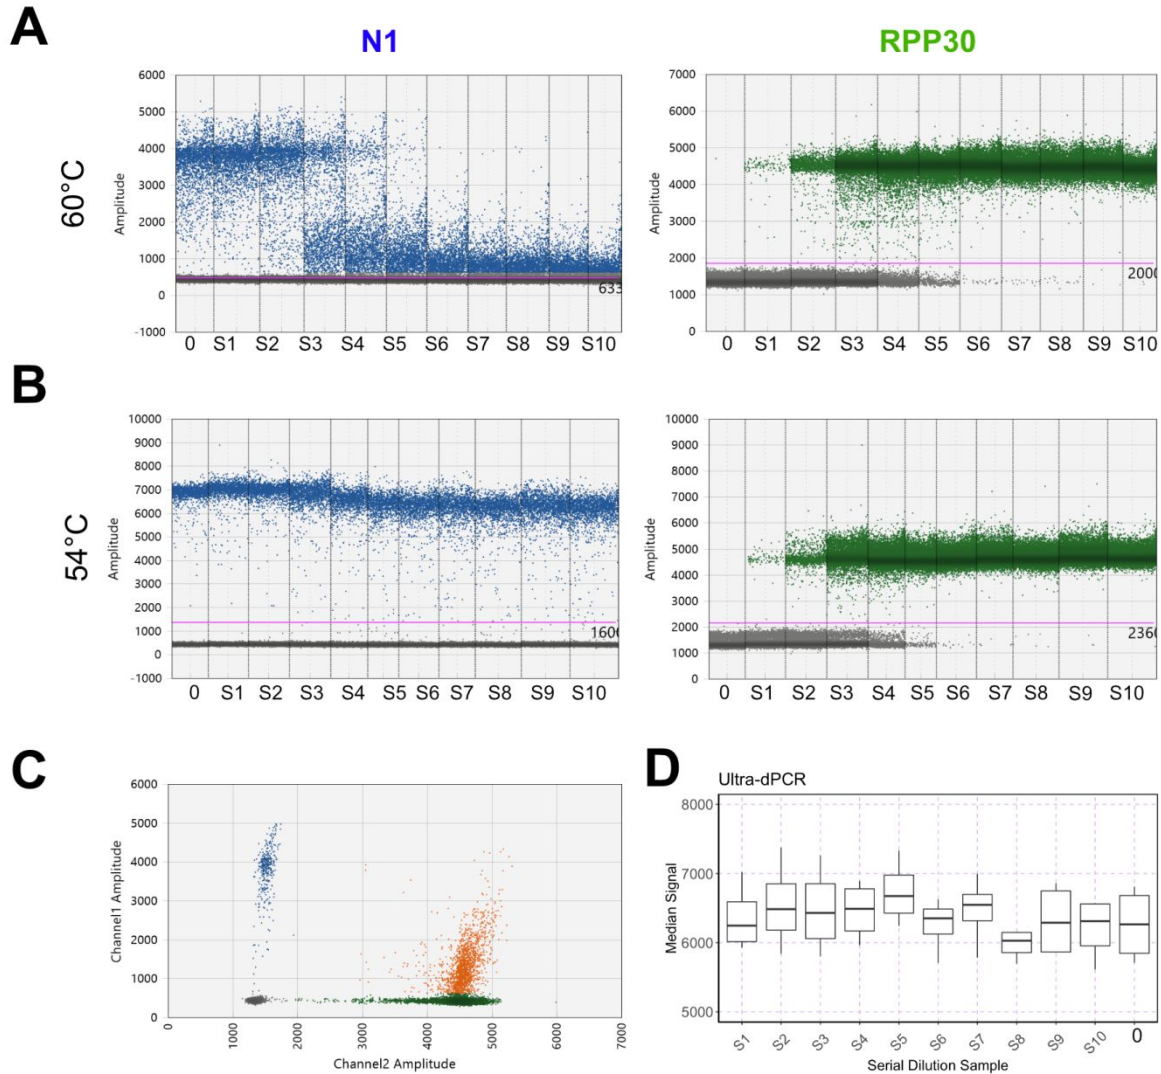

**Figure S4. UltraPCR is immune to partition-specific competition (PSC).**

- (A) 1D amplitude of SARS-CoV-2 *N1* (left, channel1) and *RPP30* (right, channel2) from QX-200 with different *RPP30* dilutions at 60°C annealing temperature. At this temperature, PSC effects are apparent as *RPP30* input increases, *N1* amplitude becomes noticeably lower and, in many partitions, the *N1* counts are lost. Note that “0” is defined as 0 expected *RPP30* input from serial dilution but contains *N1* input.
- (B) 1D amplitude of SARS-CoV-2 *N1* (left, channel1) and *RPP30* (right, channel2) from QX-200 with different *RPP30* dilutions at 54°C annealing temperature. Note that “0” is defined as 0 expected *RPP30* input from serial dilution but contains *N1* input.
- (C) 2D amplitude of a sample in (A) where orange points denote droplets that are channel1+ and channel2+, blue points denote channel1+ only, green points denote channel2+ only, and grey points denote double negative droplets. This is another depiction of the effect of PSCs, as multi-target occupied droplets in QX-200 have significantly lower amplitude in *N1* channel.
- (D) Median signal of positive droplets of SARS-CoV-2 *N1* in UltraPCR displayed as a boxplot for 4 technical replicates per serial dilution. This plot shows that in a realm where DNA targets are partitioned at low occupancy, PSC is not an issue, as exemplified by consistent signal amplitude of *N1* across all *RPP30* loading conditions. This phenomenon is observed in all

annealing temperatures tested. Note that “0” is defined as 0 expected *RPP30* input from serial dilution but contains *N1* input.

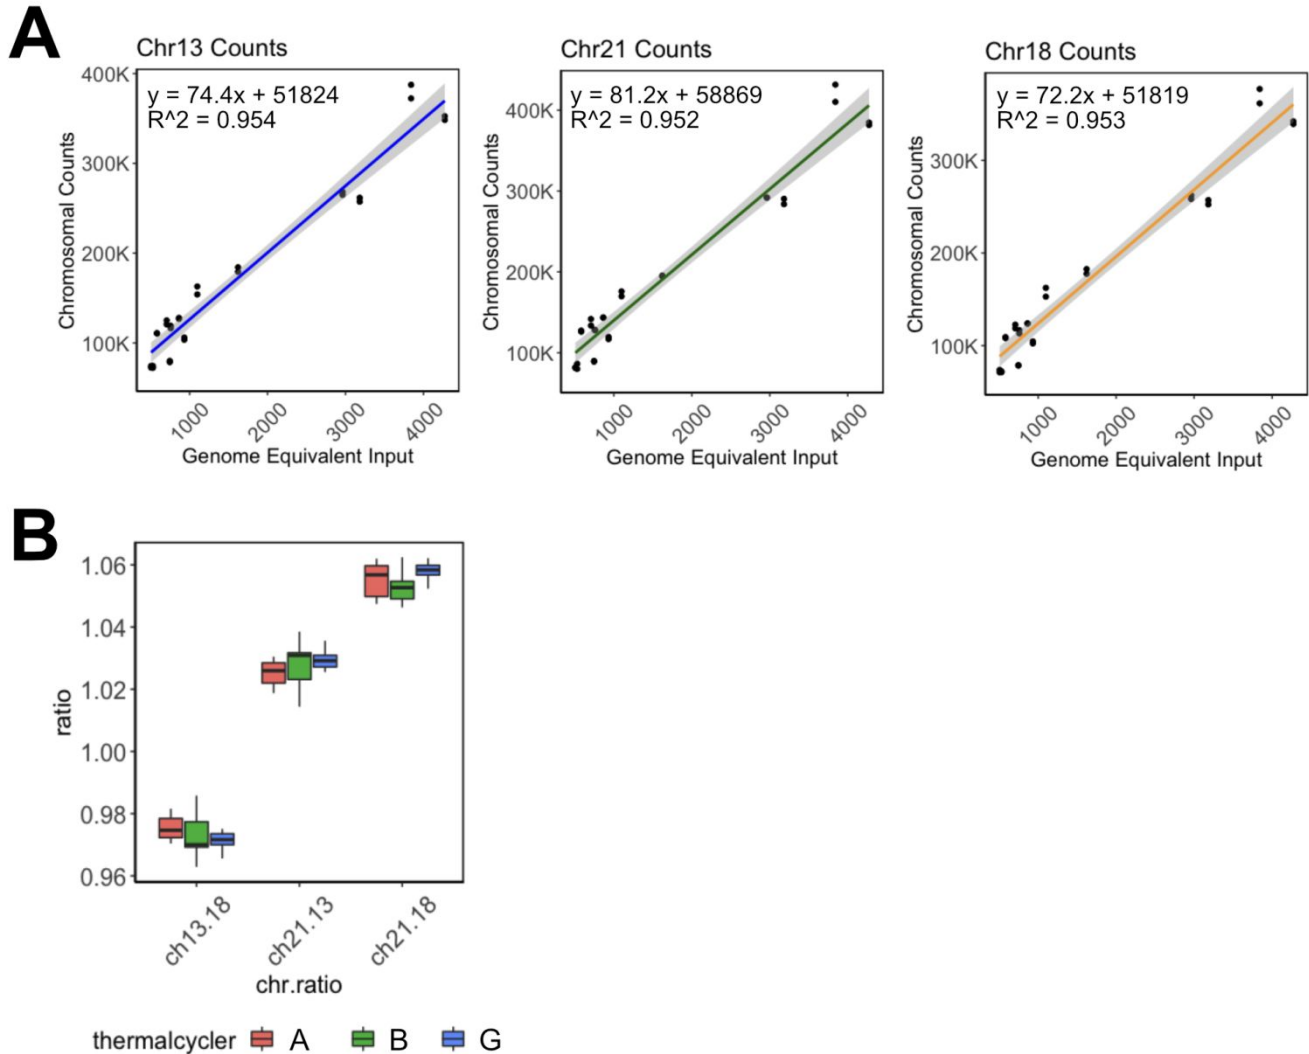

**Figure S5. UltraPCR NIPT assay characterization.**

- (A) cfDNA samples from healthy donors measured using UltraPCR NIPT assay versus TapeStation cfDNA ScreenTape (ng of cfDNA converted to genome equivalent (GE), based on a 6.6 pg/GE conversion factor). Two 10 mL blood tubes were obtained per donor and for each blood tube, extracted cfDNA was divided into 2 UltraPCR reactions. For the UltraPCR NIPT assay, Chr13, Chr18, and Chr21 counts were measured and compared independently to TapeStation data, fitted with a linear regression. Slope of chromosomal counts to GE is between 72.2-81.2, which is close to the expected increase of 74-plex per chromosome of the assay, suggesting high efficiency in assay performance.
- (B) UltraPCR NIPT assay is optimized to have low variability between thermal cyclers, as shown in this thermal cyclers reproducibility study measuring the differences in chromosomal ratios.

**Table S1. Primers and probes used for UltraPCR assays in this study.**

| Assay   | Product length (bp) | Forward Primer       | Reverse Primer           | Taqman Probe             | Final primer concentration (nM) | Final probe concentration (nM) |
|---------|---------------------|----------------------|--------------------------|--------------------------|---------------------------------|--------------------------------|
| prfA    | 280                 | CCGCAAATAGAGCCAAGCTT | GTGAGAACGGGACCATCATG     | AGCCAACCGATGTTTCTGTATCAA | 200                             | 200                            |
| RPP30   | 65                  | AGATTTGGACCTGCGAGCG  | GAGCGGCTGTCTCCACAAGT     | TTCTGACCTGAAGGCTCTGCGCG  | 200                             | 200                            |
| nCoV_N1 | 71                  | GACCCCAAATCAGCGAAAT  | TCTGGTTACTGCCAGTTGAATCTG | ACCCCGCATTACGTTTGGTGGACC | 200                             | 200                            |
| nCoV_N2 | 67                  | TTACAAACATTGGCCGCAAA | GCGCGACATTCGAAGAA        | ACAATTTGCCCCAGCGCTTCAG   | 200                             | 200                            |

**Table S2. Thermocycling conditions used for UltraPCR characterization testing.**

| Assay                     | Stage 1   | Stage 2      |            |      | Stage 3   |
|---------------------------|-----------|--------------|------------|------|-----------|
| prfA<br>RPP30<br>N1<br>N2 | 95°C      | 95°C         | 55°C       | 58°C | 12°C      |
|                           | 2 min     | 20 s         | 30 s       | 30 s | ∞         |
|                           | 1x (Hold) | 39x (Cycles) |            |      | 1x (Hold) |
| NIPT                      | 94°C      | 94°C         | 62°C       |      | 8°C       |
|                           | 2 min     | 20 s         | 1 min 30 s |      | ∞         |
|                           | 1x (Hold) | 39x (Cycles) |            |      | 1x (Hold) |

Note: all protocols have ramp rate set at 2°C/s

**Table S3. Orthogonal testing data on Bio-Rad QX-200**

| Well | Dilution | Target    | Conc(copies/ $\mu$ L) | Copies/20 $\mu$ L Well | PoissonConfMax | PoissonConfMin | Accepted Droplets | Positives | Negatives | Ch1+Ch2+ | Ch1+Ch2- | Ch1-Ch2+ |
|------|----------|-----------|-----------------------|------------------------|----------------|----------------|-------------------|-----------|-----------|----------|----------|----------|
| A01  | NTC      | N1-FAM    | 127                   | 2545                   | 134            | 121            | 15276             | 1566      | 13710     | 0        | 1566     | 0        |
| B01  | NTC      | N1-FAM    | 124                   | 2489                   | 131            | 118            | 12930             | 1298      | 11632     | 0        | 1298     | 0        |
| C01  | NTC      | N1-FAM    | 119                   | 2377                   | 125            | 113            | 16944             | 1628      | 15316     | 0        | 1628     | 0        |
| D01  | NTC      | N1-FAM    | 121                   | 2430                   | 127            | 116            | 16809             | 1649      | 15160     | 0        | 1649     | 2        |
| A01  | NTC      | RPP30-HEX | 0                     | 0                      | 0.231          | 0              | 15276             | 0         | 15276     | 0        | 1566     | 0        |
| B01  | NTC      | RPP30-HEX | 0                     | 0                      | 0.273          | 0              | 12930             | 0         | 12930     | 0        | 1298     | 0        |
| C01  | NTC      | RPP30-HEX | 0                     | 0                      | 0.208          | 0              | 16944             | 0         | 16944     | 0        | 1628     | 0        |
| D01  | NTC      | RPP30-HEX | 0.14                  | 2.8                    | 0.448          | 0.0212         | 16809             | 2         | 16807     | 0        | 1649     | 2        |
| A02  | S10      | N1-FAM    | 128                   | 2553                   | 134            | 121            | 14100             | 1450      | 12650     | 6        | 1444     | 87       |
| B02  | S10      | N1-FAM    | 122                   | 2448                   | 129            | 116            | 14402             | 1423      | 12979     | 4        | 1419     | 88       |
| C02  | S10      | N1-FAM    | 116                   | 2311                   | 121            | 110            | 15619             | 1461      | 14158     | 12       | 1449     | 101      |
| D02  | S10      | N1-FAM    | 123                   | 2467                   | 130            | 117            | 15620             | 1555      | 14065     | 17       | 1538     | 88       |
| A02  | S10      | RPP30-HEX | 7.79                  | 156                    | 9.49           | 6.3            | 14100             | 93        | 14007     | 6        | 1444     | 87       |
| B02  | S10      | RPP30-HEX | 7.54                  | 151                    | 9.19           | 6.1            | 14402             | 92        | 14310     | 4        | 1419     | 88       |
| C02  | S10      | RPP30-HEX | 8.54                  | 171                    | 10.1           | 6.97           | 15619             | 113       | 15506     | 12       | 1449     | 101      |
| D02  | S10      | RPP30-HEX | 7.94                  | 159                    | 9.45           | 6.42           | 15620             | 105       | 15515     | 17       | 1538     | 88       |
| A03  | S9       | N1-FAM    | 122                   | 2444                   | 129            | 116            | 14598             | 1440      | 13158     | 122      | 1318     | 1104     |
| B03  | S9       | N1-FAM    | 123                   | 2458                   | 129            | 117            | 14790             | 1467      | 13323     | 126      | 1341     | 1104     |
| C03  | S9       | N1-FAM    | 122                   | 2442                   | 129            | 116            | 14020             | 1382      | 12638     | 104      | 1278     | 983      |
| D03  | S9       | N1-FAM    | 123                   | 2450                   | 129            | 116            | 15865             | 1569      | 14296     | 153      | 1416     | 1171     |
| A03  | S9       | RPP30-HEX | 103                   | 2064                   | 109            | 97.4           | 14598             | 1226      | 13372     | 122      | 1318     | 1104     |
| B03  | S9       | RPP30-HEX | 102                   | 2043                   | 108            | 96.5           | 14790             | 1230      | 13560     | 126      | 1341     | 1104     |
| C03  | S9       | RPP30-HEX | 94.9                  | 1899                   | 101            | 89.3           | 14020             | 1087      | 12933     | 104      | 1278     | 983      |



|     |    |           |      |        |      |      |       |       |       |      |      |       |
|-----|----|-----------|------|--------|------|------|-------|-------|-------|------|------|-------|
| D03 | S9 | RPP30-HEX | 103  | 2050   | 108  | 97   | 15865 | 1324  | 14541 | 153  | 1416 | 1171  |
| A04 | S8 | N1-FAM    | 133  | 2655   | 139  | 126  | 15569 | 1661  | 13908 | 1053 | 608  | 8759  |
| B04 | S8 | N1-FAM    | 124  | 2474   | 130  | 117  | 14746 | 1472  | 13274 | 899  | 573  | 8116  |
| C04 | S8 | N1-FAM    | 123  | 2470   | 130  | 117  | 15888 | 1583  | 14305 | 1004 | 579  | 8921  |
| D04 | S8 | N1-FAM    | 122  | 2445   | 128  | 116  | 15815 | 1561  | 14254 | 938  | 623  | 8708  |
| A04 | S8 | RPP30-HEX | 1170 | 23409  | 1195 | 1147 | 15569 | 9812  | 5757  | 1053 | 608  | 8759  |
| B04 | S8 | RPP30-HEX | 1112 | 22237  | 1136 | 1088 | 14746 | 9015  | 5731  | 899  | 573  | 8116  |
| C04 | S8 | RPP30-HEX | 1153 | 23059  | 1177 | 1130 | 15888 | 9925  | 5963  | 1004 | 579  | 8921  |
| D04 | S8 | RPP30-HEX | 1108 | 22151  | 1131 | 1085 | 15815 | 9646  | 6169  | 938  | 623  | 8708  |
| A05 | S7 | N1-FAM    | 121  | 2415   | 127  | 115  | 16628 | 1622  | 15006 | 1430 | 192  | 13201 |
| B05 | S7 | N1-FAM    | 116  | 2330   | 123  | 110  | 13281 | 1252  | 12029 | 1090 | 162  | 10543 |
| C05 | S7 | N1-FAM    | 118  | 2367   | 124  | 112  | 15841 | 1516  | 14325 | 1315 | 201  | 12472 |
| D05 | S7 | N1-FAM    | 116  | 2321   | 122  | 110  | 16647 | 1564  | 15083 | 1369 | 195  | 13252 |
| A05 | S7 | RPP30-HEX | 2493 | 49869  | 2543 | 2446 | 16628 | 14631 | 1997  | 1430 | 192  | 13201 |
| B05 | S7 | RPP30-HEX | 2455 | 49101  | 2509 | 2403 | 13281 | 11633 | 1648  | 1090 | 162  | 10543 |
| C05 | S7 | RPP30-HEX | 2403 | 48066  | 2452 | 2357 | 15841 | 13787 | 2054  | 1315 | 201  | 12472 |
| D05 | S7 | RPP30-HEX | 2478 | 49557  | 2527 | 2431 | 16647 | 14621 | 2026  | 1369 | 195  | 13252 |
| A06 | S6 | N1-FAM    | 125  | 2499   | 131  | 119  | 16325 | 1645  | 14680 | 1627 | 18   | 14494 |
| B06 | S6 | N1-FAM    | 116  | 2317   | 123  | 109  | 11133 | 1044  | 10089 | 1029 | 15   | 9970  |
| C06 | S6 | N1-FAM    | 116  | 2313   | 122  | 110  | 15008 | 1405  | 13603 | 1384 | 21   | 13443 |
| D06 | S6 | N1-FAM    | 118  | 2354   | 124  | 112  | 15461 | 1472  | 13989 | 1465 | 7    | 13820 |
| A06 | S6 | RPP30-HEX | 5156 | 103114 | 5328 | 5005 | 16325 | 16121 | 204   | 1627 | 18   | 14494 |
| B06 | S6 | RPP30-HEX | 5200 | 103996 | 5417 | 5017 | 11133 | 10999 | 134   | 1029 | 15   | 9970  |
| C06 | S6 | RPP30-HEX | 5197 | 103949 | 5381 | 5038 | 15008 | 14827 | 181   | 1384 | 21   | 13443 |
| D06 | S6 | RPP30-HEX | 5265 | 105308 | 5452 | 5104 | 15461 | 15285 | 176   | 1465 | 7    | 13820 |
| A07 | S5 | N1-FAM    | 121  | 2422   | 127  | 115  | 15241 | 1491  | 13750 | 1488 | 3    | 13726 |

|     |    |           |      |        |       |      |       |       |       |      |   |       |
|-----|----|-----------|------|--------|-------|------|-------|-------|-------|------|---|-------|
| B07 | S5 | N1-FAM    | 120  | 2409   | 127   | 114  | 14357 | 1397  | 12960 | 1396 | 1 | 12946 |
| C07 | S5 | N1-FAM    | 122  | 2432   | 128   | 115  | 15315 | 1504  | 13811 | 1498 | 6 | 13790 |
| D07 | S5 | N1-FAM    | 118  | 2362   | 124   | 112  | 14387 | 1374  | 13013 | 1372 | 2 | 12998 |
| A07 | S5 | RPP30-HEX | 7454 | 149080 | 7929  | 7035 | 15241 | 15214 | 27    | 1488 | 3 | 13726 |
| B07 | S5 | RPP30-HEX | 8075 | 161505 | 8729  | 7523 | 14357 | 14342 | 15    | 1396 | 1 | 12946 |
| C07 | S5 | RPP30-HEX | 7460 | 149194 | 7935  | 7041 | 15315 | 15288 | 27    | 1498 | 6 | 13790 |
| D07 | S5 | RPP30-HEX | 7930 | 158609 | 8541  | 7410 | 14387 | 14370 | 17    | 1372 | 2 | 12998 |
| A08 | S4 | N1-FAM    | 117  | 2337   | 123   | 111  | 16213 | 1533  | 14680 | 1530 | 3 | 14664 |
| B08 | S4 | N1-FAM    | 121  | 2421   | 128   | 114  | 13069 | 1278  | 11791 | 1277 | 1 | 11786 |
| C08 | S4 | N1-FAM    | 121  | 2413   | 127   | 115  | 16435 | 1602  | 14833 | 1602 | 0 | 14817 |
| D08 | S4 | N1-FAM    | 129  | 2579   | 135   | 123  | 15288 | 1587  | 13701 | 1584 | 3 | 13691 |
| A08 | S4 | RPP30-HEX | 7940 | 158803 | 8515  | 7446 | 16213 | 16194 | 19    | 1530 | 3 | 14664 |
| B08 | S4 | RPP30-HEX | 9043 | 180853 | 10145 | 8202 | 13069 | 13063 | 6     | 1277 | 1 | 11786 |
| C08 | S4 | RPP30-HEX | 8158 | 163167 | 8790  | 7623 | 16435 | 16419 | 16    | 1602 | 0 | 14817 |
| D08 | S4 | RPP30-HEX | 8317 | 166350 | 9026  | 7728 | 15288 | 15275 | 13    | 1584 | 3 | 13691 |
| A09 | S3 | N1-FAM    | 112  | 2233   | 117   | 106  | 16048 | 1453  | 14595 | 1452 | 1 | 14591 |
| B09 | S3 | N1-FAM    | 117  | 2331   | 122   | 111  | 16473 | 1554  | 14919 | 1551 | 3 | 14916 |
| C09 | S3 | N1-FAM    | 125  | 2496   | 131   | 119  | 15319 | 1542  | 13777 | 1540 | 2 | 13769 |
| D09 | S3 | N1-FAM    | 129  | 2571   | 135   | 122  | 16078 | 1664  | 14414 | 1664 | 0 | 14409 |
| A09 | S3 | RPP30-HEX | 9499 | 189974 | 10728 | 8586 | 16048 | 16043 | 5     | 1452 | 1 | 14591 |
| B09 | S3 | RPP30-HEX | 9315 | 186299 | 10418 | 8474 | 16473 | 16467 | 6     | 1551 | 3 | 14916 |
| C09 | S3 | RPP30-HEX | 8629 | 172571 | 9449  | 7963 | 15319 | 15309 | 10    | 1540 | 2 | 13769 |
| D09 | S3 | RPP30-HEX | 9501 | 190018 | 10731 | 8588 | 16078 | 16073 | 5     | 1664 | 0 | 14409 |
| A10 | S2 | N1-FAM    | 126  | 2517   | 132   | 120  | 16315 | 1655  | 14660 | 1655 | 0 | 14658 |
| B10 | S2 | N1-FAM    | 124  | 2476   | 130   | 118  | 17460 | 1744  | 15716 | 1743 | 1 | 15714 |
| C10 | S2 | N1-FAM    | 125  | 2493   | 130   | 119  | 17594 | 1769  | 15825 | 1769 | 0 | 15821 |

|     |    |           |         |          |         |       |       |       |       |      |   |       |
|-----|----|-----------|---------|----------|---------|-------|-------|-------|-------|------|---|-------|
| D10 | S2 | N1-FAM    | 122     | 2442     | 128     | 116   | 18256 | 1800  | 16456 | 1800 | 0 | 16453 |
| A10 | S2 | RPP30-HEX | 10596   | 211922   | 12816   | 9227  | 16315 | 16313 | 2     | 1655 | 0 | 14658 |
| B10 | S2 | RPP30-HEX | 10199   | 203978   | 11891   | 9052  | 17460 | 17457 | 3     | 1743 | 1 | 15714 |
| C10 | S2 | RPP30-HEX | 9869    | 197389   | 11279   | 8860  | 17594 | 17590 | 4     | 1769 | 0 | 15821 |
| D10 | S2 | RPP30-HEX | 10251   | 205027   | 11943   | 9105  | 18256 | 18253 | 3     | 1800 | 0 | 16453 |
| A11 | S1 | N1-FAM    | 124     | 2477     | 130     | 118   | 15101 | 1509  | 13592 | 1509 | 0 | 13592 |
| B11 | S1 | N1-FAM    | 120     | 2396     | 126     | 114   | 17505 | 1695  | 15810 | 1695 | 0 | 15809 |
| C11 | S1 | N1-FAM    | 120     | 2402     | 126     | 114   | 16733 | 1624  | 15109 | 1624 | 0 | 15109 |
| D11 | S1 | N1-FAM    | 123     | 2461     | 129     | 117   | 16773 | 1666  | 15107 | 1666 | 0 | 15106 |
| A11 | S1 | RPP30-HEX | 1000000 | 20000000 | 1000000 | 10030 | 15101 | 15101 | 0     | 1509 | 0 | 13592 |
| B11 | S1 | RPP30-HEX | 11494   | 229888   | 15224   | 9655  | 17505 | 17504 | 1     | 1695 | 0 | 15809 |
| C11 | S1 | RPP30-HEX | 1000000 | 20000000 | 1000000 | 10150 | 16733 | 16733 | 0     | 1624 | 0 | 15109 |
| D11 | S1 | RPP30-HEX | 11444   | 228883   | 15174   | 9605  | 16773 | 16772 | 1     | 1666 | 0 | 15106 |

**Table S4. Orthogonal testing data on UltraPCR**

| <b>Dilution</b> | <b>Sample_vol_ul</b> | <b>channel1_count</b> | <b>channel2_count</b> | <b>median_signal_channel1</b> | <b>median_noise_channel1</b> | <b>median_signal_channel2</b> | <b>median_noise_channel2</b> |
|-----------------|----------------------|-----------------------|-----------------------|-------------------------------|------------------------------|-------------------------------|------------------------------|
| NTC             | 52.9956              | 1822                  | 3                     | 3067                          | 368                          | 3067                          | 563                          |
| NTC             | 55.5795              | 1684                  | 4                     | 6810                          | 370                          | 3200.5                        | 584                          |
| NTC             | 53.7933              | 1910                  | 6                     | 5711                          | 371                          | 4209                          | 606                          |
| NTC             | 54.3236              | 1948                  | 7                     | 5892                          | 369                          | 7664                          | 631                          |
| S10             | 52.077               | 1918                  | 174                   | 6572                          | 373                          | 8240                          | 550                          |
| S10             | 54.3553              | 1950                  | 170                   | 6555                          | 375                          | 7876.5                        | 570                          |
| S10             | 52.7465              | 1939                  | 149                   | 5613                          | 370                          | 7355.5                        | 602                          |
| S10             | 54.3407              | 1959                  | 143                   | 6067                          | 372                          | 7667                          | 612                          |
| S9              | 50.4001              | 1863                  | 2186                  | 6711.5                        | 368                          | 8172                          | 542                          |
| S9              | 53.515               | 1968                  | 2370                  | 6858.5                        | 374                          | 8505                          | 564                          |
| S9              | 52.1148              | 1872                  | 2203                  | 5865.5                        | 374                          | 7689                          | 590                          |
| S9              | 53.9695              | 1973                  | 2277                  | 5865                          | 376                          | 7824.5                        | 598                          |
| S8              | 46.9913              | 1655                  | 21732                 | 6151                          | 358                          | 7536                          | 537                          |
| S8              | 53.5456              | 2007                  | 25659                 | 5910                          | 361                          | 7629                          | 577                          |
| S8              | 52.5247              | 1895                  | 24678                 | 5697                          | 373                          | 7794.5                        | 652                          |
| S8              | 53.7508              | 1876                  | 25702                 | 6146.5                        | 366                          | 8069                          | 611                          |
| S7              | 53.4778              | 1899                  | 52492                 | 6994                          | 390                          | 8686.5                        | 600                          |
| S7              | 54.5839              | 2108                  | 54689                 | 6599                          | 394                          | 8372                          | 636.5                        |
| S7              | 52.1288              | 2065                  | 53101                 | 5783                          | 389                          | 8046                          | 643                          |
| S7              | 54.2903              | 1980                  | 54221                 | 6495                          | 392                          | 8517.5                        | 648                          |
| S6              | 52.4052              | 1859                  | 118844                | 6626                          | 375                          | 8574                          | 639                          |

|    |         |      |        |        |     |       |     |
|----|---------|------|--------|--------|-----|-------|-----|
| S6 | 55.6687 | 1941 | 126902 | 6440   | 387 | 8551  | 690 |
| S6 | 53.8211 | 1861 | 122789 | 6264   | 374 | 8437  | 687 |
| S6 | 53.488  | 1711 | 122521 | 5708   | 376 | 7971  | 684 |
| S5 | 50.9371 | 1774 | 152460 | 6858.5 | 383 | 8613  | 651 |
| S5 | 55.5952 | 2048 | 165562 | 6489   | 384 | 8627  | 688 |
| S5 | 52.6996 | 1965 | 160076 | 7330   | 384 | 10260 | 722 |
| S5 | 53.508  | 1930 | 161063 | 6241   | 385 | 8498  | 708 |
| S4 | 52.3932 | 1661 | 164251 | 6891   | 381 | 9290  | 692 |
| S4 | 54.9414 | 1860 | 171007 | 6741   | 382 | 9184  | 701 |
| S4 | 52.5204 | 1851 | 167586 | 6238   | 383 | 8420  | 719 |
| S4 | 53.9262 | 1939 | 170839 | 5963.5 | 388 | 8243  | 719 |
| S3 | 54.6043 | 1913 | 189074 | 6715.5 | 386 | 8692  | 694 |
| S3 | 52.3681 | 1945 | 181751 | 7261   | 401 | 9216  | 710 |
| S3 | 51.0249 | 1822 | 182480 | 5802   | 390 | 7932  | 721 |
| S3 | 54.4086 | 1881 | 188421 | 6144.5 | 383 | 8566  | 739 |
| S2 | 53.279  | 1900 | 192130 | 6676   | 392 | 8697  | 699 |
| S2 | 53.3843 | 1810 | 191515 | 7375   | 394 | 9574  | 736 |
| S2 | 50.931  | 1875 | 185897 | 5842   | 403 | 7899  | 750 |
| S2 | 53.5131 | 1975 | 191108 | 6293   | 393 | 8881  | 764 |
| S1 | 50.7397 | 1967 | 235454 | 6448   | 396 | 8256  | 710 |
| S1 | 53.458  | 1858 | 244005 | 7020   | 397 | 9363  | 755 |
| S1 | 50.1706 | 1829 | 237441 | 6044   | 407 | 8429  | 822 |
| S1 | 52.7064 | 1784 | 241517 | 5930   | 401 | 8143  | 773 |
